# Supplementary material
Source: PubMed Central journal article supplement (PMC4219335)
Supplement: chest_146_5_1176_ds01.pdf [file chest_146_5_1176_ds01.pdf]

# Laterality Defects Other Than Situs Inversus Totalis in Primary Ciliary Dyskinesia

## Insights Into Situs Ambiguus and Heterotaxy

*Adam J. Shapiro, MD; Stephanie D. Davis, MD; Thomas Ferkol, MD; Sharon D. Dell, MD; Margaret Rosenfeld, MD; Kenneth N. Olivier, MD; Scott D. Sagel, MD; Carlos Milla, MD; Maimoona A. Zariwala, PhD; Whitney Wolf, BS; Johnny L. Carson, PhD; Milan J. Hazucha, MD, PhD; Kimberlie Burns; Blair Robinson, MD; Michael R. Knowles, MD; and Margaret W. Leigh, MD; on behalf of the Genetic Disorders of Mucociliary Clearance Consortium*

CHEST 2014; 146(5):1176-1186

### **e-Appendix 1.** IRB approvals from all participating sites

#### **The University of North Carolina at Chapel Hill**

Rare Genetic Disorders of the Airways: Cross-sectional Comparison of Clinical Features, and Development of Novel Screening and Genetic Tests

Medical IRB Study # 05-2979 (GCRC#2486)

Committee Name: Office of Human Research Ethics

#### **Washington University in St. Louis**

Rare Genetic Disorders of the Airways: Cross-sectional Comparison of Clinical Features, and Development of Novel Screening and Genetic Tests – Protocol Version May 11

Medical IRB Study # 201011855

Committee Name: The Washington University in St. Louis Institutional Review Board

#### **University of Colorado, Denver; Children’s Hospital Colorado**

Rare Genetic Disorders of the Airways: Cross-sectional Comparison of Clinical Features, and Development of Novel Screening and Genetic Tests

Medical IRB Study # 04-1106

Committee Name: COMIRB - Colorado Multiple Institutional Review Board

#### **Stanford University**

Rare Genetic Disorders of the Airways: Cross-sectional Comparison of Clinical Features, and Development of Novel Screening and Genetic Tests

Medical IRB Study # 12659

Committee Name: Administrative Panel on Human Subjects in Medical Research

#### **Seattle Children’s Hospital & Medical Center**

Rare Genetic Disorders of the Airways: Cross-sectional Comparison of Clinical Features, and Development of Novel Screening and Genetic Tests

Medical IRB Study # 12017

Committee Name: Institutional Review Board

*Online supplements are not copyedited prior to posting.*

**Hospital for Sick Children**

Rare Genetic Disorders of the Airways: Cross-sectional Comparison of Clinical Features, and Development of Novel Screening and Genetic Tests

REB File # 1000009409

Committee Name: Research Ethics Board (REB)

**St. Michael's Hospital**

Rare Genetic Disorders of the Airways: Cross-sectional Comparison of Clinical Features, and Development of Novel Screening and Genetic Tests

REB File # 10-367

Committee Name: Research Ethics Office

**National Institute Allergy & Infectious Disease**

Genetic Disorders of Mucociliary Clearance

Medical IRB Study # 06-I-0217

Committee Name: Institutional Review Board

*Online supplements are not copyedited prior to posting.*

**e-Table 1.** Laterality Defects in Situs Ambiguus Participants with Classic PCD and without Classic PCD

| ID   | Age (yrs) | Situs                     | Classic PCD | Imaging                                    | Cardiac apex | Gastric bubble | Spleen | Liver | Pulmonary | Other                                                   |
|------|-----------|---------------------------|-------------|--------------------------------------------|--------------|----------------|--------|-------|-----------|---------------------------------------------------------|
| PCD1 | 0.13*     | SA + Complex CVM          | Y           | CXR, CT chest, echo, abdo US               | R            | L              | L      | R     |           | DORV, MA, PS, L-TGA                                     |
| PCD2 | 0.16*     | SA + Simple CVM           | Y           | CXR, echo                                  | R            | R              | unk    | L     |           | ASD                                                     |
| PCD3 | 1.8       | SA + Complex CVM          | Y           | CXR, Chest CT, cardiac MRI, echo, abdo US  | L            | R              | RPSP   | L     | LPI       | DORV, LAI, ASD, VSD, I-IVC, TAPVR                       |
| PCD4 | 3.0       | SA + Complex CVM          | Y           | CXR, CT sinus, echo, abdo US, BSS          | R            | R              | RPSP   | R     | LPI       | LAI, vascular ring, AVSD, HPV, RAA, TAPVR, B-SVC, malro |
| PCD5 | 4.7       | SA + Simple CVM           | Y           | CXR, CT chest/sinus, echo, abdo US         | R            | R              | R      | L     |           | D-TGA, ASD                                              |
| PCD6 | 7.8       | SA without cardiac defect | Y           | CXR, echo, abdo US,                        | R            | R              | R      | L     | LPI       |                                                         |
| PCD7 | 5.2       | SA + Complex CVM          | Y           | CXR, Echo, abdo US                         | L            | R              | ASP    | M     |           | AVSD, CA, HPV, PS, RAA, TAPVR, malro                    |
| PCD8 | 6.4       | SA without cardiac defect | Y           | CXR, CT, echo, abdo US                     | R            | R              | RPSP   | L     | LPI       |                                                         |
| PCD9 | 7.3       | SA + Simple CVM           | Y           | CXR, CT chest, CT abdo, echo, Abdo US, BSS | L            | R              | R      | L     |           | VSD, malro                                              |

*Online supplements are not copyedited prior to posting.*



# CHEST™ Online Supplement

|       |      |                                     |   |                                   |   |   |      |   |     |                                          |
|-------|------|-------------------------------------|---|-----------------------------------|---|---|------|---|-----|------------------------------------------|
| PCD10 | 7.4  | SA + Complex CVM                    | Y | CXR, CT chest, echo, abdo US, BSS | R | R | R    | L |     | L-TGA, HPV, RAA, B-SVC                   |
| PCD11 | 8.1  | SA without cardiac defect           | Y | CXR, CT chest, abdo US, BSS       | L | L | LPSP | M |     | I-IVC, malro                             |
| PCD12 | 8.1  | SA + Simple CVM                     | Y | CXR, CT chest, echo               | R | L | LPSP | M | LPI | ASD, RAA, TAPVR, malro                   |
| PCD13 | 8.5  | SA + Simple CVM                     | Y | CXR, CT chest, echo, abdo US, BSS | R | R | R    | L |     | B-SVC, ASD, VSD                          |
| PCD14 | 9.3  | SA without cardiac defect           | Y | CXT, CT chest, echo, BSS, abdo US | L | R | RPSP | L |     | malro                                    |
| PCD15 | 10.7 | SA + Simple CVM                     | Y | CXR, echo, abdo US                | R | R | R    | L |     | B-SVC, VSD                               |
| PCD16 | 11.1 | SA without cardiac defect           | Y | CXR, CT chest, echo               | R | R | LPSP | M |     | RAA                                      |
| PCD17 | 11.2 | SA without cardiac defect           | Y | CXR, CT chest, echo, BSS, abdo US | L | L | LPSP | R | LPI | I-IVC, malro                             |
| PCD18 | 11.4 | Isolated possible laterality defect | Y | CXR, CT chest, echo               | L | L | L    | R |     | TOF                                      |
| PCD19 | 11.5 | SA + Complex CVM                    | Y | CXR, CT chest, echo, abdo US      | L | M | LPSP | M | RPI | AVSD, DORV, PS, RAA, I-IVC, TAPVR, B-SVC |
| PCD20 | 12.4 | SA + Complex CVM                    | Y | CXR, CT chest, echo               | R | R | R    | R |     | DORV, L-TGA, ASD, VSD, PS, B-SVC         |

*Online supplements are not copyedited prior to posting.*



# CHEST™ Online Supplement

|       |      |                                     |   |                                         |   |   |      |   |     |                                |
|-------|------|-------------------------------------|---|-----------------------------------------|---|---|------|---|-----|--------------------------------|
| PCD21 | 12.9 | SA + Complex CVM                    | Y | CXR, CT chest, echo                     | L | R | R    | L |     | DORV, L-TGA, ASD, VSD, PS, RAA |
| PCD22 | 13.4 | Isolated possible laterality defect | Y | CXR, CT chest                           | L | L | unk  | R | LPI |                                |
| PCD23 | 14.0 | Isolated possible laterality defect | Y | CXR, CT chest, echo                     | L | L | L    | R |     | VSD                            |
| PCD24 | 15.6 | SA without cardiac defect           | Y | CXR, CT chest, CT abdo                  | R | R | RPSP | L |     | B-SVC                          |
| PCD25 | 16.0 | Isolated possible laterality defect | Y | CXR, CT chest                           | L | L | L    | R |     | I-IVC                          |
| PCD26 | 16.9 | SA without cardiac defect           | Y | CXR, CT chest, echo, BSS                | R | R | RPSP | L | LPI | I-IVC, malro                   |
| PCD27 | 18.6 | Isolated possible laterality defect | Y | CXR, CT chest, echo                     | L | L | L    | R |     | VSD                            |
| PCD28 | 20.5 | SA + Simple CVM                     | Y | CXR, CT chest, echo, BSS                | R | R | R    | L |     | ASD, VSD                       |
| PCD29 | 22.7 | Isolated possible laterality defect | Y | CXR, CT chest/sinus, echo, abdo US, BSS | L | L | L    | R |     | RAA                            |

*Online supplements are not copyedited prior to posting.*



# CHEST™ Online Supplement

|       |       |                                     |   |                                      |   |   |      |   |  |                                    |
|-------|-------|-------------------------------------|---|--------------------------------------|---|---|------|---|--|------------------------------------|
| PCD30 | 24.6  | Isolated possible laterality defect | Y | CXR, CT chest, Echo, abdo US         | L | L | LPSP | R |  |                                    |
| PCD31 | 30.7  | SA without cardiac defect           | Y | CXR, CT chest, echo                  | L | R | RPSP | L |  |                                    |
| PCD32 | 31.7  | SA without cardiac defect           | Y | CXR, CT chest/sinus, CT abdo, echo   | R | R | RPSP | L |  |                                    |
| PCD33 | 34.7  | SA without cardiac defect           | Y | CXR, CT chest, echo                  | R | L | LPSP | M |  | RAA, I-IVC                         |
| PCD34 | 35.8  | SA without cardiac defect           | Y | CXR, CT chest/sinus                  | R | R | RPSP | L |  |                                    |
| PCD35 | 45.8  | SA without cardiac defect           | Y | CXR, ct chest, ct abdo, abdo us, BSS | L | 0 | RPSP | M |  | duplicated IVC                     |
| PCD36 | 55.2  | Isolated possible laterality defect | Y | CXR, CT chest, echo                  | L | L | L    | R |  | B-SVC                              |
| PCD37 | 58.0  | SA without cardiac defect           | Y | CXR, CT chest, CT abdo               | L | R | ASP  | R |  | I-IVC, bilateral livers, PKD       |
|       |       |                                     |   |                                      |   |   |      |   |  |                                    |
| SA1   | 0.10* | SA + Complex CVM                    |   | CXR, CT chest, abdo US, echo         | R | R | ASP  | L |  | AVSD, HPV, PS, L-TGA, TAPVR, B-SVC |

*Online supplements are not copyedited prior to posting.*



# CHEST™ Online Supplement

|      |           |                                     |  |                                   |   |   |      |     |     |                                                      |
|------|-----------|-------------------------------------|--|-----------------------------------|---|---|------|-----|-----|------------------------------------------------------|
| SA2  | 0.50<br>* | SA without cardiac defect           |  | abdo US, echo, BSS                | L | R | RPSP | M   |     | I-IVC, malro                                         |
| SA3  | 0.76<br>* | SA + Complex CVM                    |  | CXR, CT chest, echo, abdo US, BSS | L | R | R    | M   | RPI | ASD, HPV, PS, I-IVC                                  |
| SA4  | 0.77<br>* | SA + Complex CVM                    |  | CXR, echo, abdo US, BSS           | L | R | ASP  | M   |     | AVSD, HPV, PS, L-TGA, TAPVR, malro                   |
| SA5  | 0.77<br>* | SA + Simple CVM                     |  | CXR, echo, abdo US, BSS           | R | L | L    | R   |     | dextroposition, CA, PAPVR, I-IVC, L-SVC, RAA, malro  |
| SA6  | 0.84<br>* | SA + Complex CVM                    |  | CXR, CT chest, echo               | L | R | ASP  | R   |     | AVSD, ASD, VSD, Atrial SI, DORV, D-TGA, TAPVR, B-SVC |
| SA7  | 0.88<br>* | SA + Simple CVM                     |  | CXR, echo                         | R | R | unk  | unk |     | L-TGA, I-IVC, RAA                                    |
| SA8  | 1.1       | SA + Simple CVM                     |  | CXR, CT chest, echo, abdo US, BSS | R | L | L    | R   |     | dextroposition, dextrorotation, ASD, B-SVC           |
| SA9  | 1.6       | Isolated possible laterality defect |  | CXR, echo, abdo US                | R | L | L    | R   |     | Isolated dextrocardia                                |
| SA10 | 1.6       | SA + Complex CVM                    |  | CXR, echo, BSS                    | R | R | RPSP | M   |     | L-TGA, ASD, HPV, I-IVC, malro                        |
| SA11 | 2.3       | SA without cardiac defect           |  | CXR, echo, abdo US, BSS           | R | R | RPSP | L   |     | I-IVC, B-SVC, malro                                  |
| SA12 | 3.0       | SA without cardiac defect           |  | CXR, echo, abdo US                | R | R | RPSP | M   |     |                                                      |

*Online supplements are not copyedited prior to posting.*



# CHEST™ Online Supplement

|      |     |                                     |  |                                   |   |   |      |   |  |                                   |
|------|-----|-------------------------------------|--|-----------------------------------|---|---|------|---|--|-----------------------------------|
| SA13 | 3.2 | Isolated possible laterality defect |  | CXR, CT chest, BSS                | L | L | unk  | R |  | ASD, VSD                          |
| SA14 | 3.3 | SA + Simple CVM                     |  | CXR, echo, BSS                    | L | L | unk  | R |  | B-SVC, D-TGA, ASD                 |
| SA15 | 3.3 | Isolated possible laterality defect |  | CXR, CT chest/sinus, echo, BSS    | L | L | L    | R |  | PAPVR                             |
| SA16 | 3.6 | SA + Simple CVM                     |  | CXR, CT chest, echo, BSS          | L | L | L    | R |  | D-TGA, PS, hydrocephalus          |
| SA17 | 4.0 | SA + Complex CVM                    |  | CXR, echo, abdo US, BSS           | R | L | LPSP | R |  | ASD, VSD, PS, L-TGA, I-IVC, malro |
| SA18 | 4.9 | SA + Simple CVM                     |  | CXR, CT chest, echo, BSS          | R | R | RPSP | L |  | ASD, VSD, I-IVC, B-SVC            |
| SA19 | 5.3 | SA without cardiac defect           |  | CT chest, CT abdo, echo, BSS      | L | R | RPSP | M |  | I-IVC                             |
| SA20 | 5.6 | SA + Simple CVM                     |  | CT chest, Sinus xray, echo        | R | R | R    | L |  | D-TGA, coarct                     |
| SA21 | 5.9 | SA + Simple CVM                     |  | CXR, CT chest, echo, BSS, abdo US | L | R | RPSP | M |  | OVR AOR, VSD, I-IVC               |
| SA22 | 6.2 | SA + Simple CVM                     |  | CXR, Echo                         | R | R | unk  | L |  | OVR AOR, VSD, D-TGA, B-SVC        |
| SA23 | 6.5 | SA + Simple CVM                     |  | CXR, echo, abdo US                | R | R | R    | L |  | ASD                               |

*Online supplements are not copyedited prior to posting.*





# CHEST™ Online Supplement

|      |      |                                     |  |                                         |   |   |      |   |     |                                                       |
|------|------|-------------------------------------|--|-----------------------------------------|---|---|------|---|-----|-------------------------------------------------------|
| SA24 | 6.8  | SA without cardiac defect           |  | CXR, CT chest, echo, BSS                | R | R | LPSP | L |     | malro                                                 |
| SA25 | 7.3  | SA + Complex CVM                    |  | CXR, CT chest/sinus, echo, abdo US      | R | L | ASP  | R |     | DORV, AVSD, ASD, L-TGA, PS                            |
| SA26 | 7.4  | Isolated possible laterality defect |  | CXR, CT chest, echo, BSS                | L | L | unk  | R |     | D-TGA                                                 |
| SA27 | 8.0  | SA + Complex CVM                    |  | CXR, CT chest/sinus, echo, abdo US, BSS | L | L | ASP  | M | RPI | AVSD, HPV, PS, D-TGA, RAA, I-IVC, TAPVR, B-SVC, malro |
| SA28 | 8.1  | SA + Complex CVM                    |  | CXR, CT chest, echo, abdo US            | L | R | ASP  | M |     | AVSD, DORV, PS, L-TGA, RAA, TAPVR, B-SVC, malro       |
| SA29 | 8.4  | Isolated possible laterality defect |  | CXR, CT chest, echo                     | L | L | L    | R |     | TOF                                                   |
| SA30 | 8.7  | Isolated possible laterality defect |  | CXR, CT chest, echo                     | L | L | L    | R |     | PS                                                    |
| SA31 | 9.2  | SA + Complex CVM                    |  | CXR, CT chest, echo, abdo US            | R | R | R    | L |     | DORV, PA, MA, B-SVC                                   |
| SA32 | 10.3 | SA + Simple CVM                     |  | CXR, CT chest, echo                     | R | R | R    | L |     | VSD                                                   |
| SA33 | 10.8 | SA + Simple CVM                     |  | CXR, CT chest, echo                     | L | L | LPSP | R | LPI | AVSD, I-IVC, B-SVC, malro, biliary atresia            |

*Online supplements are not copyedited prior to posting.*



# CHEST™ Online Supplement

|      |      |                                     |  |                                                    |   |   |      |   |     |                                                                            |
|------|------|-------------------------------------|--|----------------------------------------------------|---|---|------|---|-----|----------------------------------------------------------------------------|
| SA34 | 12.0 | SA + Complex CVM                    |  | CXR, echo, abdo US, cardiac MRI, cath              | L | R | ASP  | L |     | AVSD, HPV, PS, D-TGA, I-IVC, TAPVR, B-SVC                                  |
| SA35 | 15.2 | SA + Simple CVM                     |  | CXR, CT chest/sinus, echo, abdo US                 | L | L | LPSP | R | LPI | VSD, PS, I-IVC, malro, absent distal pancreas                              |
| SA36 | 15.9 | SA + Simple CVM                     |  | CXR, CT chest/sinus, echo, BSS                     | M | L | L    | R |     | B-SVC                                                                      |
| SA37 | 16.3 | Isolated possible laterality defect |  | CXR, CT chest, echo                                | L | L | L    | R |     | TAPVR                                                                      |
| SA38 | 25.1 | SA + Complex CVM                    |  | CXR, CT chest/sinus, echo, abdo US, BSS            | L | L | ASP  | M | RPI | AVSD, CA, HPV, PS, D-TGA, TAPVR, malro, annular pancreas, duodenal atresia |
| SA39 | 26.3 | SA without cardiac defect           |  | CT chest, CXR, echo                                | L | R | RPSP | M |     |                                                                            |
| SA40 | 34.7 | SA without cardiac defect           |  | CXR, CT chest, CT abdo                             | L | R | RPSP | L | LPI | I-IVC                                                                      |
| SA41 | 38.8 | SA without cardiac defect           |  | CXR, CT chest, CT abdo, echo, abdo US, spleen scan | R | R | RPSP | L | LPI | RAA, B-SVC, Coarc                                                          |

\*Participants under 1 year of age not included in data analysis.

Abdo US – abdominal ultrasound, ann panc – annular pancreas, AVSD - atrioventricular septal defect, ASD - atrial septal defect, ASP – asplenia, bil atr – biliary atresia, BSS – barium swallow study, B-SVC - bilateral superior vena cava, coarc - coarctation of aorta, CA - common atrium, cath – cardiac catheterization, CHHD- classic heterotaxic heart defect,, CXR – chest x-ray, D-TGA - dextro transposition of great arteries, DORV - double outlet right ventricle, Echo – echocardiogram, HPV - hypoplastic ventricle, I-IVC -

*Online supplements are not copyedited prior to posting.*

# CHEST™ Online Supplement

interrupted inferior vena cava, L – left, LAI - left atrial isomerism, L-TGA - levo transposition of great arteries, LPSP – left polysplenia, LPI – left pulmonary isomerism, M – mesocardia, malro - intestinal malrotation,, Mid – midline, OVR AOR - overriding aorta, PAPVR – partial anomalous pulmonary venous return, PS - pulmonary stenosis/atresia, PSP – polysplenia, R – right, RAA - right aortic arch, RPSP – right polysplenia, RPI – right pulmonary isomerism, TAPVR - total anomalous pulmonary venous return, TOF - tetralogy of Fallot, unk – unknown status, VSD – ventricular septal defect.

*Online supplements are not copyedited prior to posting.*
